## Acknowledgements

The European Society for Medical Oncology wishes to express its appreciation and gratitude to the following persons for their major effort to select the abstract content of this Educational and Abstract Book:

Matti Aapro, Switzerland  
Adamos Adamou, Cyprus  
Emilio Bajetta, Italy  
Regina Beets-Tan, The Netherlands  
Paolo G. Casali, Italy  
Monica Castiglione, Switzerland  
Rafael Catane, Israel  
Andrés Cervantes, Spain  
Francesco Cognetti, Italy  
Serena Di Cosimo, Spain  
Martin F. Fey, Switzerland  
Marina Garassino, Italy  
Giuseppe Giaccone, USA  
Aron Goldhirsch, Switzerland

Stanley B. Kaye, United Kingdom  
Claus-Henning Köhne, Germany  
Roberto Labianca, Italy  
Nicholas Pavlidis, Greece  
Giorgio Scagliotti, Italy  
Dirk Schrijvers, Belgium  
Hans-Jörg Senn, Switzerland  
Cristiana Sessa, Switzerland  
Jean-Charles Soria, France  
Cora N. Sternberg, Italy  
Roger Stupp, Switzerland  
Eric Van Cutsem, Belgium  
John Wagstaff, United Kingdom

## ECLU 2007 Best Abstract Awards

For the first time, the ECLU 2007 Working Group has awarded the six best abstracts submitted by YO with free ESMO membership for 2008 and free registration to the ESMO Congress, Stockholm 2008. The honors go to:

Gerhardt Attard, United Kingdom  
Semra Aydin, Italy  
Alberto Carmona-Bayonas, Spain

Marina Garassino, Italy  
Daniele Generali, Italy  
Paloma Martin-Martorell, Spain

## ECLU Travel Awards

ECLU travel awards have been selected by the ECLU Working Party on a competitive basis from among the accepted abstracts. ESMO-supported travel awards have been assigned to:

Gerhardt Attard, United Kingdom  
Jair Bar, Israel  
Ullas Batra, India  
Riyad Bendardaf, Finland  
Ana Bosch Campos, Spain  
Issa Dahabreh, Greece  
Sonali Dey, India  
Tusi Dutta, India  
Konstantinos Economopoulos, Greece  
Dilshod Egamberdiev, Uzbekistan  
Soma Ghosh, India  
Shikha Goyal, India  
Margaret Hutka, Poland  
Abraham Jacob, India  
Vladimir Jurisic, Serbia and Montenegro  
Rouslan Kadiev, Russian Federation  
Svetlana Kalyadina, Russian Federation  
Narayan Karanth, India  
Pranjali Karanth, India  
Eleni Karapanagiotou, Greece  
Natalia Khranovska, Ukraine  
Do Yeun Kim, Republic of Korea  
Natalia Kozlova, Russian Federation  
Pankaj Malhotra, India  
Nikolay Malishev, Kazakhstan

Mario Mandalà, Italy  
Paloma Martin-Martorell, Spain  
Zhasmina Mihalyova, Bulgaria  
Marijana Milovic, Serbia  
Apurba Mondal, India  
Ashish Mukhopadhyay, India  
Soma Mukhopadhyay, India  
Vasile Musteata, Moldova  
Jay Naik, United Kingdom  
Anes Pasic, Bosnia & Herzegovina  
Champklata Paul, India  
Kumar Prabhaskar, India  
Tarun Puri, India  
Ofer Purim, Israel  
Alison Reid, United Kingdom  
Rakhi Sarkar, India  
Pramod Shankpal, India  
Shantanu Sharma, India  
Rehab Shembesh, Libya  
Elizabeth Smyth, Ireland  
Anton Snegovoy, Russian Federation  
Ilya Tsimafeyev, Russian Federation  
Spartak Valev, Bulgaria  
Xiao-Tong Zhang, China

The European Society for Medical Oncology wishes to express its gratitude to all participating companies of the ECLU Conference in Lugano. Educational and scientific initiatives in favour of Young Oncologists are of the utmost importance to ESMO, and we appreciate the support of the following companies to invest in the education of Europe's future oncology leaders.

## Exhibition

The following companies exhibit at the ESMO Conference Lugano (as of May 2007):

|                    |                                                                                   |                         |                                                                                     |
|--------------------|-----------------------------------------------------------------------------------|-------------------------|-------------------------------------------------------------------------------------|
| Chiltern           |  | Nature Publishing Group |  |
| Eli Lilly          |  | Novartis                |  |
| GE Healthcare      |  | Roche                   |  |
| Genta Incorporated |  | Roche Diagnostics       |  |
| Helsinn            |  | Wyeth Pharmaceuticals   |  |

Societies:

|                                                |                                                                                    |                                           |                                                                                     |
|------------------------------------------------|------------------------------------------------------------------------------------|-------------------------------------------|-------------------------------------------------------------------------------------|
| AIOM - Italian Association of Medical Oncology |   | ESO – European School of Oncology         |  |
| ESMO – European Society for Medical Oncology   |  | UICC – International Union Against Cancer |  |

Publishers

|         |                                                                                     |           |                                                                                       |
|---------|-------------------------------------------------------------------------------------|-----------|---------------------------------------------------------------------------------------|
| Informa |  | Wisepress |  |
|---------|-------------------------------------------------------------------------------------|-----------|---------------------------------------------------------------------------------------|

Advertising of a specific product does not mean acceptance by ESMO and it is the full responsibility of the corporation that it is in accordance with the Swiss and European law, where applicable.

Without responsibility for any misprints.

|                                                                                                                                                                         |                                                                                       |
|-------------------------------------------------------------------------------------------------------------------------------------------------------------------------|---------------------------------------------------------------------------------------|
| ECLU is organized under the auspices of the City of Lugano, which ESMO thanks for its valuable collaboration and generous support.                                      |  |
| ESMO also expresses its gratitude to Swiss International Airlines, the official carrier of ECLU 2007, for having offered preferential fares to conference participants. |  |

The 6th ESMO Patient Seminar is endorsed by:

|                                |                                                                                       |                                                                                             |
|--------------------------------|---------------------------------------------------------------------------------------|---------------------------------------------------------------------------------------------|
| Swiss League Against Cancer    |  | <b>krebsliga schweiz</b><br>ligue suisse contre le cancer<br>lega svizzera contro il cancro |
| Lega Ticinese Contro il Cancro |  | <b>Lega ticinese contro il cancro</b>                                                       |
